# Supplementary material for: The exogenous natural phospholipids, EPA-PC and EPA-PE, contribute to ameliorate inflammation and promote macrophage polarization
Source: Royal Society of Chemistry journal article supplement (doi:10.1039/d0fo00804d), 2020-01-01
Supplement: d0fo00804d1.pdf [file d0fo00804d1.pdf]

The exogenous natural phospholipids, EPA-PC and EPA-PE, contributes to ameliorate  
inflammation and promote macrophages polarization

Yingying Tian<sup>ac†</sup>, Yanjun Liu<sup>a†</sup>, Changhu Xue<sup>ab\*</sup>, Jingfeng Wang<sup>a\*</sup>, Yuming Wang<sup>a\*</sup>, Jie Xu<sup>a</sup>,  
Zhaojie Li<sup>a</sup>

<sup>a</sup> College of Food Science and Engineering, Ocean University of China, Qingdao, China.

<sup>b</sup> National Laboratory for Marine Science and Technology, Qingdao, China.

<sup>c</sup> Marine Biomedical Research Institute of Qingdao, Qingdao, China.

† Yingying Tian and Yanjun Liu have contributed equally to this work.

\* Correspondence: Correspondence: Dr. Changhu Xue (xuechanghuouc@163.com,  
0532-82032468), Dr. Jingfeng Wang (jfwang@ouc.edu.cn, 0532-82031967), and Dr. Yuming  
Wang (wangyuming@ouc.edu.cn, 0532-82032272)

## Methods

### 1.1 Preparation and analysis of EPA-PC

Phospholipids enriched with EPA was extracted from sea cucumber (*Cucumaria frondosa*, Nanshan Aquatic Market, Qingdao, China). Briefly, sea cucumber were ground into powder after vacuum freeze-drying. Then, the powder was extracted with a 20-fold volume of chloroform–methanol solution (2:1, v/v) overnight. The extracted solution was mixed with a one-fourth volume of water after filtration. The mixture was placed into a separating funnel and maintained for 24 h; then, the chloroform layer containing the total lipids was collected and evaporated to dryness under vacuum. Then, phospholipids enriched with EPA were separated from the total lipids by silica-gel column chromatography using chloroform, acetone, chloroform/methanol (9:1, v/v), chloroform/methanol (2:1, v/v) and methanol sequentially as eluents. The chloroform/methanol (2:1, v/v) eluent and methanol eluent were collected; then, EPA-PL were obtained after removal of the organic solvents under vacuum. EPA-PC were purified from EPA-PL respectively by silica-gel column chromatography. The fatty acid composition of EPA-PC was determined using an Agilent 6890 Gas Chromatograph with a flame-ionization detector. The column was a HPINNOW-AX capillary column (30 m × 0.32 mm × 0.25 m). The temperature of the detector and injector were kept constant at 250 °C and 240 °C, respectively, and the oven temperature was increased from 170 °C to 240 °C at 3 °C min<sup>-1</sup> and maintained at 240 °C for 15 min. Nitrogen was used as the carrier gas at a flow rate of 1.2 mL min<sup>-1</sup>. EPA-PC contained EPA about 48.8%.

The lipid analysis of EPA-PC and EPA-PE was performed by RPLC-Q Exactive-MS/MS system (Thermo Fisher, Waltham, MA, USA). An Acquity UPLC BEH C18 column

(2.1mm×100mm, 1.7 μm) (Waters, MA, USA) was applied. Mobile phase A consisted of acetonitrile/water (60:40, v/v) with 5 mmol ammonium formate and 0.2% ammonia; mobile phase B was isopropanol/acetonitrile (90:10, v/v). The elution gradient was set as follows: 25% B for 2 min; 25% to 50% B for 6 min; 50% to 90% B for 5 min; 90% to 99% B for 6 min and keeping the condition (99% B) for 6 min; 99% to 25% B for 1 min and keep the condition (25% B) for 5 min. The flow rate was set at 0.35 mL/min; the column oven was maintained at 45°C. An aliquot of 5 μL was injected into the RPLC-Q Exactive-MS/MS system. Full Scan-ddMS2 positive-ion mode was applied with HESI source; source temperature of 300°C; Ion transfer tube temperature of 3.5 kV; Sheath gas flow of 38 arbitrary units; Auxiliary gas flow of 10 arbitrary units; a range of m/z 200-1000 for MS scans with a resolution of 35000, and a range of m/z 100-700 for MS/MS scans with a resolution of 17500. The lipid analyses revealed the peaks of PC (16:0/20:5, [M+HCOO]<sup>+</sup> = 824.56; 18:0/20:5; [M+HCOO]<sup>+</sup> = 852.56), and PE (16:0/20:5, [M-H]<sup>+</sup> = 736.50; 18:0/20:5; [M+HCOO]<sup>+</sup> = 764.50).

Table S1 The list of qPCR primer sequences used in this publication.

| Gene         | Forward or Reverse     | sequences                   |
|--------------|------------------------|-----------------------------|
| IL-6         | Forward primer (5'-3') | AACGATGATGCACTTGCAGA        |
|              | Reverse primer (5'-3') | GAGCATTGGAAATTGGGGTA        |
| TNF $\alpha$ | Forward primer (5'-3') | TCCCCAAAGGGATGAGAAGTTC      |
|              | Reverse primer (5'-3') | TCATACCAGGGTTTGAGCTCAG      |
| IL-10        | Forward primer (5'-3') | GATTTTAATAAGCTCCAAGACCAAGGT |
|              | Reverse primer (5'-3') | CTTCTATGCAGTTGATGAAGATGTCAA |
| IL-1 $\beta$ | Forward primer (5'-3') | GCAACTGTTCTGAACTCAACT       |
|              | Reverse primer (5'-3') | ATCTTTTGGGGTCCGTCAACT       |
| 36B4         | Forward primer (5'-3') | CGTCCTCGTTGGAGTGACA         |
|              | Reverse primer (5'-3') | CGGTGCGTCAGGGATTG           |
| Tgf- $\beta$ | Forward primer (5'-3') | CTTCAATACGTCAGACATTCGGG     |
|              | Reverse primer (5'-3') | GTAACGCCAGGAATTGTTGCTA      |
| Mcp1         | Forward primer (5'-3') | GGCTCAGCCAGATGCAGTTAAC      |
|              | Reverse primer (5'-3') | AGCCTACTCATTGGGATCATCTTG    |
| Arg1         | Forward primer (5'-3') | GCTGGTCTGCTGGAAAACTT        |
|              | Reverse primer (5'-3') | CCGTGGGTTCTTCACAATTT        |
| iNOS         | Forward primer (5'-3') | TCCTGTTGTTTCTATTCTTTGTT     |
|              | Reverse primer (5'-3') | CATCAACCAGTATTATDDCTCCT     |

Table S2 The tissue weight in HFSD-fed mice.

|                  | Chow diet    | HFSD                      | EPA-PC                   | EPA-PE                   |
|------------------|--------------|---------------------------|--------------------------|--------------------------|
| Liver weight (g) | 0.81 ± 0.08  | 1.43 ± 0.21 <sup>##</sup> | 0.98 ± 0.11 <sup>#</sup> | 0.86 ± 0.09 <sup>#</sup> |
| iWAT weight (g)  | 0.569 ± 0.10 | 1.36 ± 0.14 <sup>##</sup> | 1.12 ± 0.24              | 1.24 ± 0.18              |

<sup>##</sup> P < 0.01, <sup>#</sup> P < 0.05, vs chow diet mice.

<sup>\*</sup>P < 0.05, vs HFSD-fed mice.

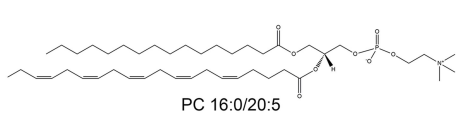

PC 16:0/20:5

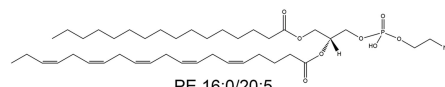

PE 16:0/20:5

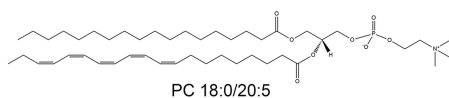

PC 18:0/20:5

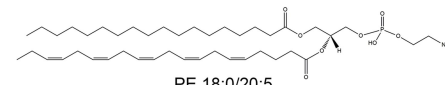

PE 18:0/20:5

EPA-PC

EPA-PE

Fig. S1 The structure of EPA-PC and EPA-PE.
